# Supplementary material for: The High Prevalence of Sarcopenia in Rheumatoid Arthritis in the Korean Population: A Nationwide Cross-Sectional Study
Source: MDPI journal article supplement (doi:10.3390/healthcare11101401), 2023-05-12
Supplement: s1 [file s1]

**Supplement Table S1.** Baseline characteristics of the participants with and without rheumatoid arthritis in group with age < 40 years

|                            | Men ( <i>n</i> = 2399) |          |                           |          |          | Women ( <i>n</i> = 3239) |          |                           |          |          |
|----------------------------|------------------------|----------|---------------------------|----------|----------|--------------------------|----------|---------------------------|----------|----------|
|                            | RA ( <i>n</i> = 1)     |          | Non-RA ( <i>n</i> = 2398) |          | <i>p</i> | RA ( <i>n</i> = 11)      |          | Non-RA ( <i>n</i> = 3228) |          | <i>p</i> |
|                            | <b>n</b>               | <b>%</b> | <b>n</b>                  | <b>%</b> |          | <b>n</b>                 | <b>%</b> | <b>n</b>                  | <b>%</b> |          |
| <b>Age (in years)</b>      | 32                     |          | 30.91 ± 5.855             |          | 0.852    | 31.64 ± 5.870            |          | 30.84 ± 5.898             |          | 0.654    |
| <b>Obesity</b>             |                        |          |                           |          | 0.187    |                          |          |                           |          | 0.720    |
| Underweight                | 0                      | 0        | 90                        | 3.8      |          | 1                        | 9.1      | 367                       | 11.4     |          |
| Normal weight              | 0                      | 0        | 1469                      | 61.3     |          | 9                        | 81.8     | 2319                      | 71.8     |          |
| Overweight                 | 1                      | 100.0    | 839                       | 35.0     |          | 1                        | 9.1      | 542                       | 16.8     |          |
| <b>Menopause</b>           |                        |          |                           |          | -        |                          |          |                           |          | 0.869    |
| Yes                        | -                      | -        | -                         | -        |          | 0                        | 0        | 8                         | 0.2      |          |
| No                         | -                      | -        | -                         | -        |          | 11                       | 100      | 3220                      | 99.8     |          |
| <b>Hypertension</b>        |                        |          |                           |          | 0.111    |                          |          |                           |          | 0.142    |
| Normal                     | 0                      | 0        | 1179                      | 49.2     |          | 11                       | 100      | 2697                      | 83.6     |          |
| Pre-hypertension           | 0                      | 0        | 838                       | 34.9     |          | 0                        | 0        | 431                       | 13.4     |          |
| Hypertension               | 1                      | 100.0    | 381                       | 15.9     |          | 0                        | 0        | 100                       | 3.1      |          |
| <b>Diabetes mellitus</b>   |                        |          |                           |          | 0.686    |                          |          |                           |          | 0.889    |
| Normal                     | 1                      | 100.0    | 2061                      | 85.9     |          | 10                       | 90.9     | 2952                      | 91.4     |          |
| Impaired fasting glucose   | 0                      | 0        | 293                       | 12.2     |          | 0                        | 0        | 227                       | 7.0      |          |
| Diabetes mellitus          | 0                      | 0        | 44                        | 1.8      |          | 1                        | 9.1      | 49                        | 1.5      |          |
| <b>Dyslipidemia</b>        |                        |          |                           |          | 0.377    |                          |          |                           |          | 0.226    |
| Normal                     | 0                      | 0        | 1052                      | 43.9     |          | 3                        | 27.3     | 1468                      | 45.5     |          |
| Dyslipidemia               | 1                      | 100.0    | 1346                      | 56.1     |          | 8                        | 72.7     | 1760                      | 54.5     |          |
| <b>Alcohol consumption</b> |                        |          |                           |          | 0.138    |                          |          |                           |          | 0.208    |
| None                       | 0                      | 0        | 435                       | 18.1     |          | 3                        | 27.3     | 1527                      | 47.3     |          |
| Moderate                   | 0                      | 0        | 1387                      | 57.8     |          | 7                        | 63.6     | 1470                      | 45.5     |          |
| Heavy                      | 1                      | 100.0    | 576                       | 24.0     |          | 1                        | 9.1      | 49                        | 7.2      |          |
| <b>Smoking status</b>      |                        |          |                           |          | 0.594    |                          |          |                           |          | 0.421    |
| Never                      | 0                      | 0        | 600                       | 25.0     |          | 10                       | 90.9     | 2659                      | 82.4     |          |
| Past                       | 1                      | 100.0    | 528                       | 22.0     |          | 1                        | 9.1      | 295                       | 9.1      |          |
| Current                    | 0                      | 0        | 1270                      | 53.0     |          | 0                        | 0        | 274                       | 8.5      |          |

|                         |   |       |      |      |       |       |      |      |  |
|-------------------------|---|-------|------|------|-------|-------|------|------|--|
| <b>Household income</b> |   |       |      |      | 0.289 | 0.777 |      |      |  |
| Lowest                  | 0 | 0     | 190  | 7.9  | 1     | 9.1   | 240  | 7.4  |  |
| Lower middle            | 1 | 100.0 | 617  | 25.7 | 3     | 27.3  | 849  | 26.3 |  |
| Upper middle            | 0 | 0     | 854  | 35.6 | 4     | 36.4  | 1135 | 35.2 |  |
| Highest                 | 0 | 0     | 737  | 30.7 | 3     | 27.3  | 1004 | 31.1 |  |
| <b>Education</b>        |   |       |      |      | 0.322 | 0.694 |      |      |  |
| Primary school or lower | 0 | 0     | 16   | 0.7  | 0     | 0     | 23   | 0.7  |  |
| Middle school           | 0 | 0     | 48   | 2.0  | 0     | 0     | 67   | 2.1  |  |
| High school             | 0 | 0     | 1140 | 47.5 | 5     | 45.5  | 1531 | 47.4 |  |
| University or higher    | 1 | 100.0 | 1194 | 49.8 | 6     | 54.5  | 1607 | 49.8 |  |
| <b>Sarcopenia</b>       |   |       |      |      | 0.153 | 0.713 |      |      |  |
| Absent                  | 0 | 0     | 2031 | 84.7 | 10    | 90.9  | 2743 | 85.0 |  |
| Present                 | 1 | 100.0 | 367  | 15.3 | 1     | 9.1   | 485  | 15.0 |  |

---

RA = rheumatoid arthritis.

Data are given as mean  $\pm$  standard deviation or the number with percentage.

---

**Supplement Table S2.** Baseline characteristics of the participants with and without rheumatoid arthritis in group with  $40 \leq \text{age} < 59$  years

|                            | Men ( <i>n</i> = 2802) |          |                           |          |          | Women ( <i>n</i> = 3760) |          |                           |          |          |
|----------------------------|------------------------|----------|---------------------------|----------|----------|--------------------------|----------|---------------------------|----------|----------|
|                            | RA ( <i>n</i> = 4)     |          | Non-RA ( <i>n</i> = 2798) |          | <i>p</i> | RA ( <i>n</i> = 31)      |          | Non-RA ( <i>n</i> = 3729) |          | <i>p</i> |
|                            | <b>n</b>               | <b>%</b> | <b>n</b>                  | <b>%</b> |          | <b>n</b>                 | <b>%</b> | <b>n</b>                  | <b>%</b> |          |
| <b>Age (in years)</b>      | 52.50 ± 2.646          |          | 49.08 ± 5.811             |          | 0.239    | 52.06 ± 4.434            |          | 49.12 ± 5.645             |          | 0.004    |
| <b>Obesity</b>             |                        |          |                           |          | 0.162    |                          |          |                           |          | 0.191    |
| Underweight                | 0                      | 0        | 51                        | 1.8      |          | 2                        | 6.5      | 85                        | 2.3      |          |
| Normal weight              | 1                      | 25.0     | 1610                      | 57.5     |          | 22                       | 71.0     | 2485                      | 66.6     |          |
| Overweight                 | 3                      | 75.0     | 1137                      | 40.6     |          | 7                        | 22.6     | 1159                      | 31.1     |          |
| <b>Menopause</b>           |                        |          |                           |          | -        |                          |          |                           |          | < 0.001  |
| Yes                        | -                      | -        | -                         | -        |          | 25                       | 80.6     | 1535                      | 41.2     |          |
| No                         | -                      | -        | -                         | -        |          | 6                        | 19.4     | 2194                      | 58.8     |          |
| <b>Hypertension</b>        |                        |          |                           |          | 0.274    |                          |          |                           |          | 0.009    |
| Normal                     | 1                      | 25.0     | 900                       | 32.2     |          | 7                        | 22.6     | 1880                      | 50.4     |          |
| Pre-hypertension           | 0                      | 0        | 843                       | 30.1     |          | 14                       | 45.2     | 949                       | 25.4     |          |
| Hypertension               | 3                      | 75.0     | 1055                      | 37.7     |          | 10                       | 32.3     | 900                       | 24.1     |          |
| <b>Diabetes mellitus</b>   |                        |          |                           |          | 0.571    |                          |          |                           |          | 0.215    |
| Normal                     | 2                      | 50.0     | 1683                      | 60.2     |          | 27                       | 87.1     | 2833                      | 76.0     |          |
| Impaired fasting glucose   | 1                      | 25.0     | 787                       | 28.1     |          | 1                        | 3.2      | 663                       | 17.8     |          |
| Diabetes mellitus          | 1                      | 25.0     | 328                       | 11.7     |          | 3                        | 9.7      | 233                       | 6.2      |          |
| <b>Dyslipidemia</b>        |                        |          |                           |          | 0.925    |                          |          |                           |          | 0.922    |
| Normal                     | 1                      | 25.0     | 758                       | 27.1     |          | 7                        | 22.6     | 870                       | 23.3     |          |
| Dyslipidemia               | 3                      | 75.0     | 2040                      | 72.9     |          | 24                       | 77.4     | 2859                      | 76.7     |          |
| <b>Alcohol consumption</b> |                        |          |                           |          | 0.418    |                          |          |                           |          | 0.127    |
| None                       | 2                      | 50.0     | 615                       | 22.0     |          | 22                       | 71.0     | 2180                      | 58.5     |          |
| Moderate                   | 1                      | 25.0     | 1467                      | 52.4     |          | 9                        | 29.0     | 1390                      | 37.3     |          |
| Heavy                      | 1                      | 25.0     | 716                       | 25.6     |          | 0                        | 0        | 159                       | 4.3      |          |
| <b>Smoking status</b>      |                        |          |                           |          | 0.407    |                          |          |                           |          | 0.054    |
| Never                      | 1                      | 25.0     | 451                       | 16.1     |          | 26                       | 83.9     | 3469                      | 93.0     |          |
| Past                       | 2                      | 50.0     | 1074                      | 38.4     |          | 3                        | 9.7      | 94                        | 2.5      |          |
| Current                    | 1                      | 25.0     | 1273                      | 45.5     |          | 2                        | 6.5      | 166                       | 4.5      |          |

|                         |   |      |      |      |       |    |      |      |      |         |
|-------------------------|---|------|------|------|-------|----|------|------|------|---------|
| <b>Household income</b> |   |      |      |      | 0.245 |    |      |      |      | 0.036   |
| Lowest                  | 0 | 0    | 246  | 8.8  |       | 6  | 19.4 | 433  | 23.0 |         |
| Lower middle            | 1 | 25.0 | 610  | 21.8 |       | 9  | 29.0 | 913  | 18.7 |         |
| Upper middle            | 0 | 0    | 900  | 32.2 |       | 11 | 35.5 | 1115 | 39.5 |         |
| Highest                 | 3 | 75.0 | 1042 | 37.2 |       | 5  | 16.1 | 1268 | 34.0 |         |
| <b>Education</b>        |   |      |      |      | 0.390 |    |      |      |      | < 0.001 |
| Primary school or lower | 1 | 25.0 | 322  | 11.9 |       | 14 | 45.2 | 856  | 23.0 |         |
| Middle school           | 1 | 25.0 | 422  | 15.1 |       | 10 | 32.3 | 697  | 18.7 |         |
| High school             | 1 | 25.0 | 1041 | 37.2 |       | 5  | 16.1 | 1474 | 39.5 |         |
| University or higher    | 1 | 25.0 | 1003 | 35.8 |       | 2  | 6.5  | 702  | 18.8 |         |
| <b>Sarcopenia</b>       |   |      |      |      | 0.849 |    |      |      |      | 0.039   |
| Absent                  | 3 | 75.0 | 2207 | 78.9 |       | 18 | 58.1 | 2772 | 74.3 |         |
| Present                 | 1 | 25.0 | 591  | 21.1 |       | 13 | 41.9 | 957  | 25.7 |         |

---

RA = rheumatoid arthritis.

Data are given as mean  $\pm$  standard deviation or the number with percentage.

---

**Supplement Table S3.** Baseline characteristics of the participants with and without rheumatoid arthritis in group with age  $\geq 60$  years

|                            | Men ( <i>n</i> = 2188) |      |                           |      |          | Women ( <i>n</i> = 2799) |      |                           |      |          |
|----------------------------|------------------------|------|---------------------------|------|----------|--------------------------|------|---------------------------|------|----------|
|                            | RA ( <i>n</i> = 21)    |      | Non-RA ( <i>n</i> = 2167) |      | <i>p</i> | RA ( <i>n</i> = 88)      |      | Non-RA ( <i>n</i> = 2711) |      | <i>p</i> |
|                            | n                      | %    | n                         | %    |          | n                        | %    | n                         | %    |          |
| <b>Age (in years)</b>      | 72.10 $\pm$ 7.569      |      | 68.75 $\pm$ 6.088         |      | 0.013    | 69.17 $\pm$ 6.837        |      | 69.10 $\pm$ 6.289         |      | 0.914    |
| <b>Obesity</b>             |                        |      |                           |      | 0.097    |                          |      |                           |      | 0.022    |
| Underweight                | 0                      | 0    | 100                       | 4.6  |          | 4                        | 4.5  | 82                        | 3.0  |          |
| Normal weight              | 12                     | 57.1 | 1455                      | 67.1 |          | 60                       | 68.2 | 1571                      | 57.9 |          |
| Overweight                 | 9                      | 42.9 | 612                       | 28.2 |          | 24                       | 27.3 | 1058                      | 39.0 |          |
| <b>Menopause</b>           |                        |      |                           |      | -        |                          |      |                           |      | 0.184    |
| Yes                        | -                      | -    | -                         | -    |          | 80                       | 90.9 | 2566                      | 94.3 |          |
| No                         | -                      | -    | -                         | -    |          | 8                        | 9.1  | 155                       | 5.7  |          |
| <b>Hypertension</b>        |                        |      |                           |      | 0.392    |                          |      |                           |      | 0.866    |
| Normal                     | 7                      | 33.3 | 405                       | 18.7 |          | 14                       | 15.9 | 452                       | 16.7 |          |
| Pre-hypertension           | 3                      | 14.3 | 539                       | 24.9 |          | 21                       | 23.9 | 587                       | 21.7 |          |
| Hypertension               | 11                     | 52.4 | 1223                      | 56.4 |          | 53                       | 60.2 | 1672                      | 61.7 |          |
| <b>Diabetes mellitus</b>   |                        |      |                           |      | 0.709    |                          |      |                           |      | 0.709    |
| Normal                     | 12                     | 57.1 | 1123                      | 51.8 |          | 53                       | 60.2 | 1601                      | 59.1 |          |
| Impaired fasting glucose   | 1                      | 4.8  | 603                       | 27.8 |          | 20                       | 22.7 | 574                       | 21.2 |          |
| Diabetes mellitus          | 8                      | 38.1 | 441                       | 20.4 |          | 15                       | 17.0 | 536                       | 19.8 |          |
| <b>Dyslipidemia</b>        |                        |      |                           |      | 0.233    |                          |      |                           |      | 0.020    |
| Normal                     | 9                      | 42.9 | 667                       | 30.8 |          | 15                       | 17.0 | 259                       | 9.6  |          |
| Dyslipidemia               | 12                     | 57.1 | 1500                      | 69.2 |          | 73                       | 83.0 | 2452                      | 90.4 |          |
| <b>Alcohol consumption</b> |                        |      |                           |      | 0.004    |                          |      |                           |      | 0.145    |
| None                       | 14                     | 66.7 | 807                       | 37.2 |          | 76                       | 86.4 | 2174                      | 80.2 |          |
| Moderate                   | 7                      | 33.3 | 1127                      | 52.0 |          | 12                       | 13.6 | 518                       | 19.1 |          |
| Heavy                      | 0                      | 0    | 233                       | 10.8 |          | 0                        | 0    | 19                        | 0.7  |          |
| <b>Smoking status</b>      |                        |      |                           |      | 0.609    |                          |      |                           |      | 0.255    |
| Never                      | 3                      | 14.3 | 355                       | 16.4 |          | 77                       | 87.5 | 2464                      | 90.9 |          |
| Past                       | 11                     | 52.4 | 1201                      | 55.4 |          | 4                        | 4.5  | 129                       | 4.8  |          |
| Current                    | 7                      | 33.3 | 611                       | 28.2 |          | 7                        | 8.0  | 118                       | 4.4  |          |

|                         |    |      |      |      |       |    |      |      |      |       |
|-------------------------|----|------|------|------|-------|----|------|------|------|-------|
| <b>Household income</b> |    |      |      |      | 0.008 |    |      |      |      | 0.271 |
| Lowest                  | 15 | 71.4 | 846  | 39.0 |       | 50 | 56.8 | 1347 | 49.7 |       |
| Lower middle            | 3  | 14.3 | 621  | 28.7 |       | 18 | 20.5 | 244  | 25.4 |       |
| Upper middle            | 1  | 4.8  | 387  | 17.9 |       | 11 | 12.5 | 233  | 14.1 |       |
| Highest                 | 2  | 9.5  | 313  | 14.4 |       | 9  | 10.2 | 62   | 10.8 |       |
| <b>Education</b>        |    |      |      |      | 0.145 |    |      |      |      | 0.182 |
| Primary school or lower | 12 | 57.1 | 967  | 44.6 |       | 75 | 85.2 | 2172 | 80.1 |       |
| Middle school           | 4  | 19.0 | 443  | 20.4 |       | 9  | 10.2 | 244  | 9.0  |       |
| High school             | 5  | 23.8 | 477  | 22.0 |       | 3  | 3.4  | 233  | 8.6  |       |
| University or higher    | 0  | 0    | 280  | 12.9 |       | 1  | 1.1  | 62   | 2.3  |       |
| <b>Sarcopenia</b>       |    |      |      |      | 0.001 |    |      |      |      | 0.462 |
| Absent                  | 7  | 33.3 | 1445 | 66.7 |       | 60 | 68.2 | 1745 | 64.4 |       |
| Present                 | 14 | 66.7 | 722  | 33.3 |       | 28 | 31.8 | 966  | 35.6 |       |

---

RA = rheumatoid arthritis.

Data are given as mean  $\pm$  standard deviation or the number with percentage.

---
